# Supplementary material for: Growth Response of Nine Tree Species to Water Supply in Planting Soils Representative for Urban Street Tree Sites
Source: MDPI journal article supplement (doi:10.3390/f13060936), 2022-06-15

Figure S1: Spatial distribution of planting pits, treatment and control plantation soils and tree species in a 4 x 35 grid.

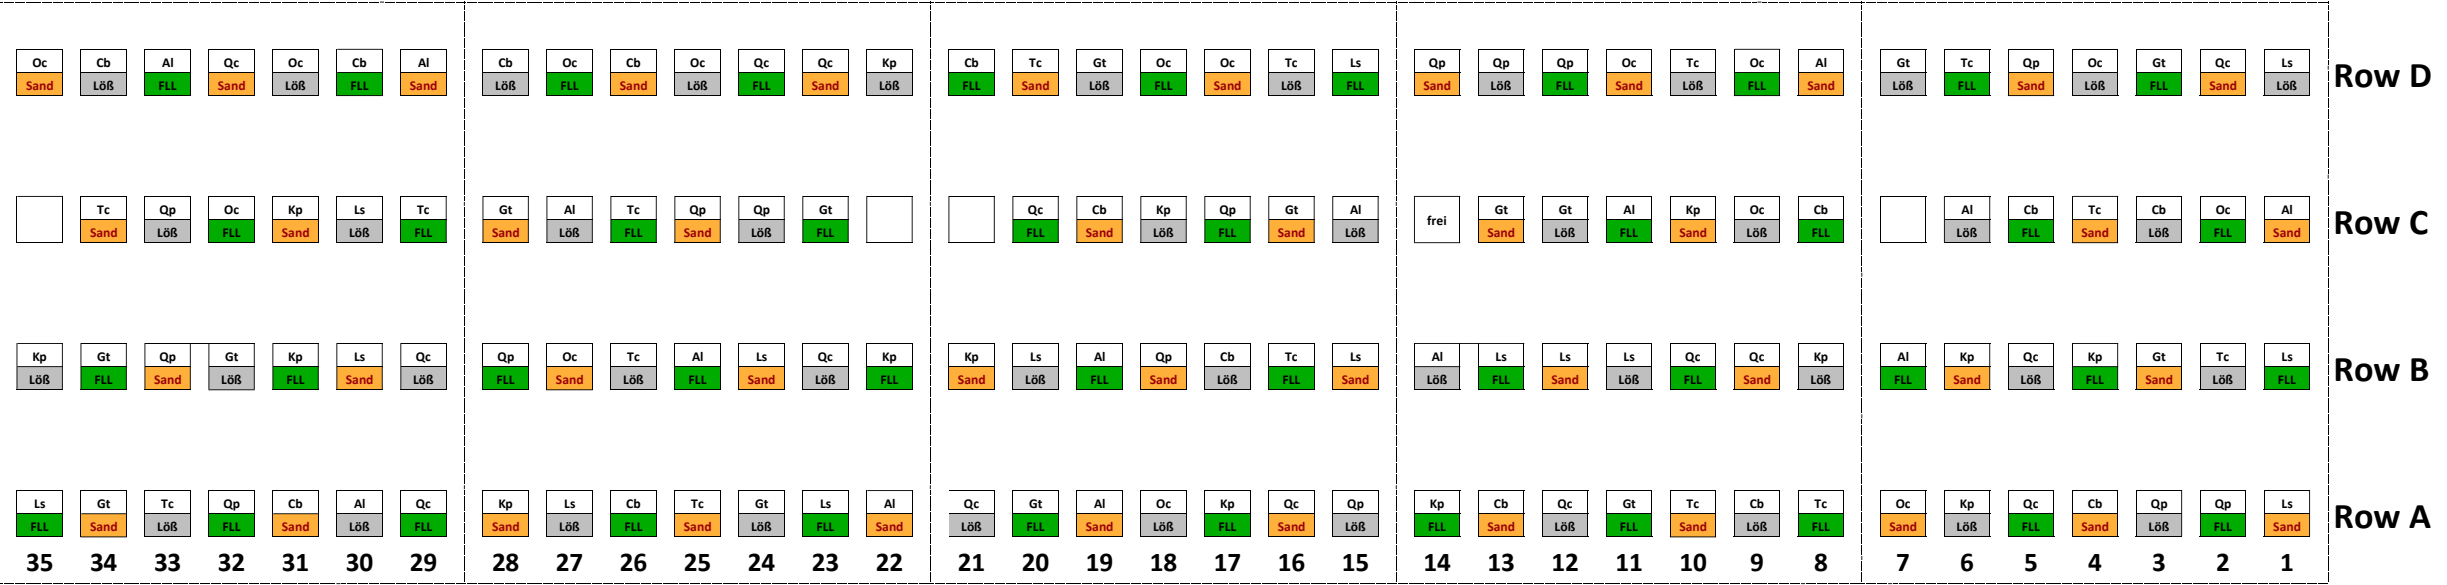

Figure S2: View on the experimental site in western direction in June 2019. The three planting soils are clearly visible (light = 'Sand'; dark = 'FLL', brown = 'Loamy-Silt'). Watering bags were removed after 2019.

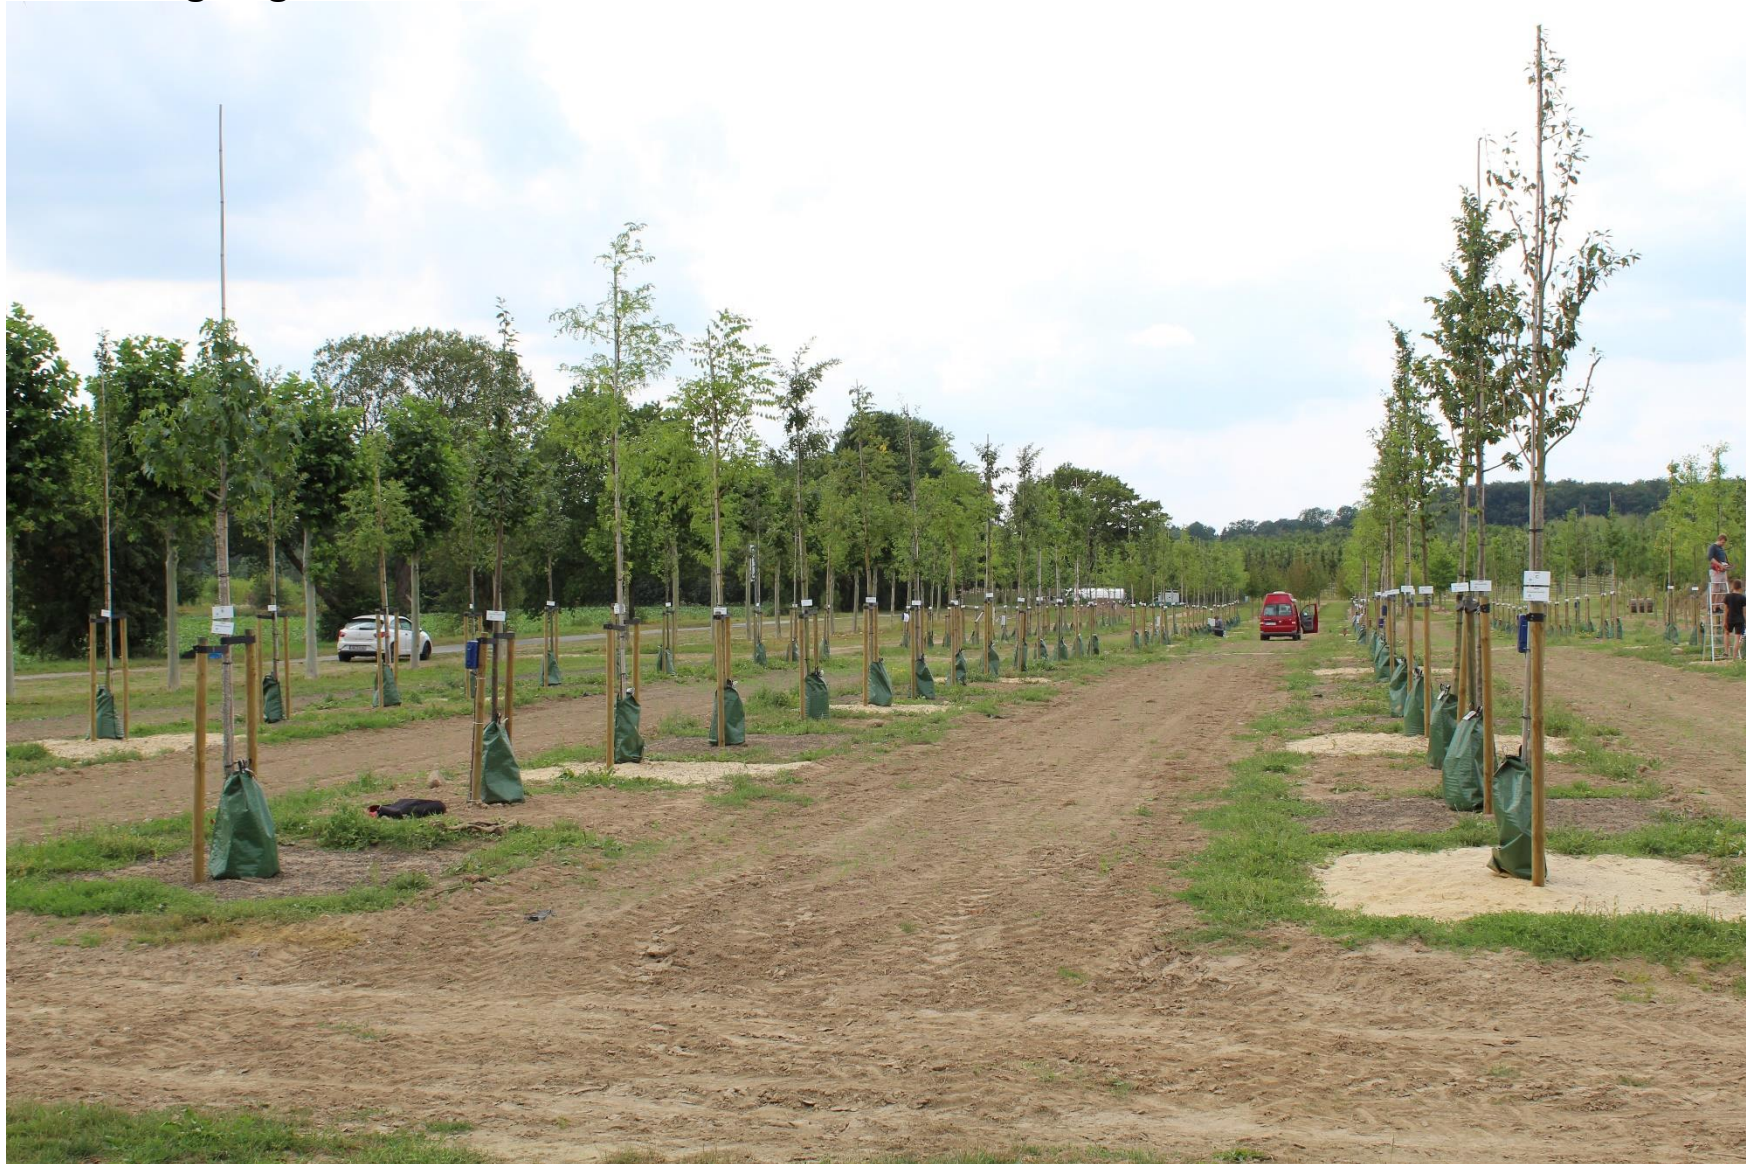

Figure S3: Annual DBH- and shoot growth in each investigated year as a mean of all species (n=9) in the planting soils (n=3). Statistical analysis were performed by using a one-way ANOVA. The same letters indicate no significant differences at the  $p \leq 0.05$  level provided separately for overall growth (boxes), growth in substrates across all years (legend) and growth in the years across all substrates (x-axis). Mean comparisons were performed by Tukey post-hoc comparisons.

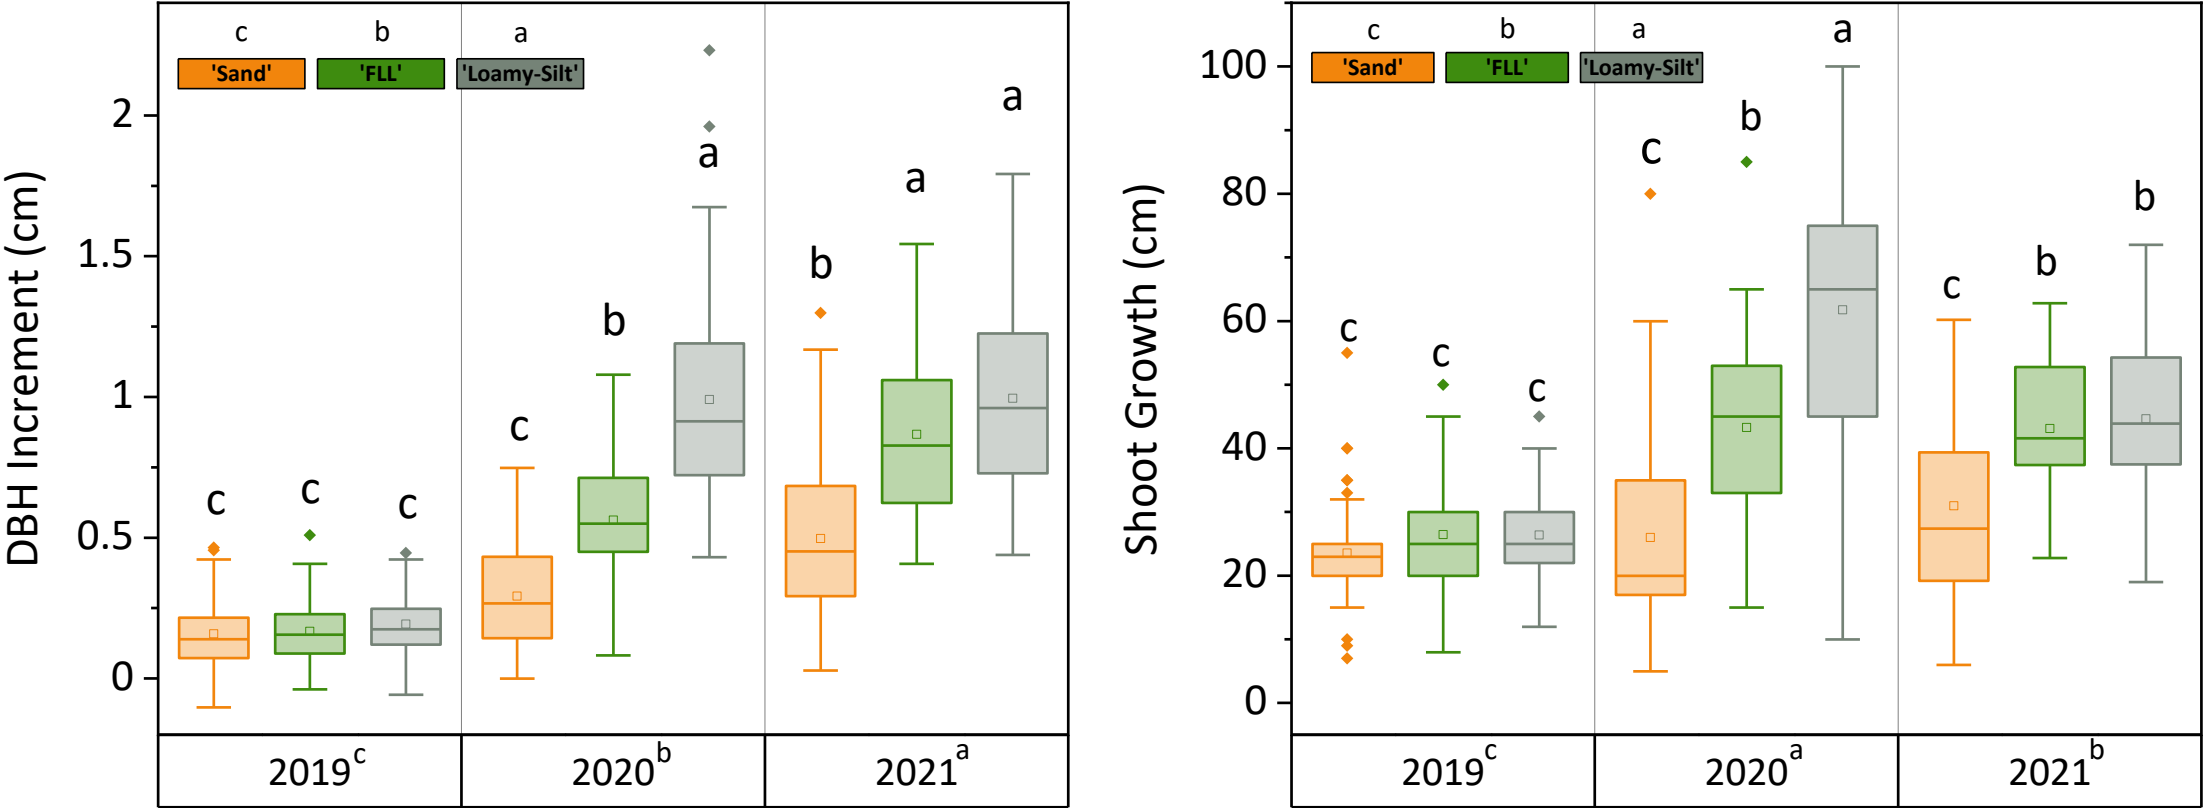

Supplement: s1 [file s1]
